# Supplementary material
Source: HighWire-hosted journal article supplement (https://bmjopen.bmj.com/content/6/10/e012366)
Supplement: inline-supplementary-material-1 [file inline-supplementary-material-1.pdf]

**Table A: Top five list recommendations with sufficient reliability**

| <b>Recommendation</b>                                                                                                                                                                                                                                                                                          | <b>Publishing Medical Society</b>                                                   |
|----------------------------------------------------------------------------------------------------------------------------------------------------------------------------------------------------------------------------------------------------------------------------------------------------------------|-------------------------------------------------------------------------------------|
| <b>CWI recommendations with S3 guideline equivalents associated with an “A” GoR (category “1A”)</b>                                                                                                                                                                                                            |                                                                                     |
| Don’t prescribe bed rest for acute localized back pain without completing an evaluation.                                                                                                                                                                                                                       | American Academy of Physical Medicine and Rehabilitation                            |
| Don’t order an imaging study for back pain without performing a thorough physical examination.                                                                                                                                                                                                                 | American Academy of Physical Medicine and Rehabilitation                            |
| Avoid lumbar spine imaging in the emergency department for adults with non-traumatic back pain unless the patient has severe or progressive neurologic deficits or is suspected of having a serious underlying condition (such as vertebral infection, cauda equine syndrome, or cancer with bony metastasis). | American College of Emergency Physicians                                            |
| Don’t do imaging for low back pain within the first six weeks, unless red flags are present.                                                                                                                                                                                                                   | American Academy of Family Physicians                                               |
| Don’t obtain imaging (plain radiographs, magnetic resonance imaging, computed tomography [CT], or other advanced imaging) of the spine in patients with non-specific acute low back pain and without red flags.                                                                                                | American Association of Neurological Surgeons and Congress of Neurological Surgeons |
| Don’t obtain imaging studies in patients with non-specific low back pain.                                                                                                                                                                                                                                      | American College of Physicians                                                      |
| Avoid imaging studies (MRI, CT or X-rays) for acute low back pain without specific indications.                                                                                                                                                                                                                | American Society of Anesthesiologists – Pain Medicine                               |
| Don’t recommend advanced imaging (e.g., MRI) of the spine within the first six weeks in patients with non-specific acute low back pain in the absence of red flags.                                                                                                                                            | North American Spine Society                                                        |
| Avoid prescribing antibiotics in the emergency department for uncomplicated sinusitis.                                                                                                                                                                                                                         | American College of Emergency Physicians                                            |
| Don’t order sinus computed tomography (CT) or indiscriminately prescribe antibiotics for uncomplicated acute rhinosinusitis.                                                                                                                                                                                   | American Academy of Allergy, Asthma & Immunology                                    |
| Don’t routinely prescribe antibiotics for acute mild-to-moderate sinusitis unless symptoms last for seven or more days, or symptoms worsen after initial clinical improvement.                                                                                                                                 | American Academy of Family Physicians                                               |
| Antibiotics should not be used for apparent viral respiratory illnesses (sinusitis, pharyngitis, bronchitis).                                                                                                                                                                                                  | American Academy of Pediatrics                                                      |
| Avoid prescribing antibiotics for upper respiratory infections.                                                                                                                                                                                                                                                | Infectious Diseases Society of America                                              |
| Don’t perform sentinel lymph node biopsy or other diagnostic tests for the evaluation of early, thin melanoma because they do not improve survival.                                                                                                                                                            | American Academy of Dermatology                                                     |
| Don’t screen for carotid artery stenosis (CAS) in asymptomatic adult patients.                                                                                                                                                                                                                                 | American Academy of Family Physicians                                               |
| Don’t routinely screen for prostate cancer using a prostate-specific antigen (PSA) test or digital rectal exam.                                                                                                                                                                                                | American Academy of Family Physicians                                               |
| Don’t routinely perform PSA-based screening for prostate cancer.                                                                                                                                                                                                                                               | American College of Preventive Medicine                                             |
| Don’t perform PSA testing for prostate cancer screening in men with no symptoms of the disease when they are expected to live less than 10 years.                                                                                                                                                              | American Society of Clinical Oncology                                               |
| Don’t use post-operative splinting of the wrist after carpal tunnel release for long-term relief.                                                                                                                                                                                                              | American Academy of Orthopaedic Surgeons                                            |
| Don’t perform annual stress cardiac imaging or advanced non-invasive imaging as part of routine                                                                                                                                                                                                                | American College of Cardiology                                                      |

|                                                                                                                                                                                                                                                                             |                                                          |
|-----------------------------------------------------------------------------------------------------------------------------------------------------------------------------------------------------------------------------------------------------------------------------|----------------------------------------------------------|
| follow-up in asymptomatic patients.                                                                                                                                                                                                                                         |                                                          |
| Avoid performing routine stress testing after percutaneous coronary intervention (PCI) without specific clinical indications.                                                                                                                                               | Society for Cardiovascular Angiography and Interventions |
| Don't perform routine annual stress testing after coronary artery revascularization.                                                                                                                                                                                        | Society of Nuclear Medicine and Molecular Imaging        |
| Don't perform stress cardiac imaging or advanced non-invasive imaging in the initial evaluation of patients without cardiac symptoms unless high-risk markers are present.                                                                                                  | American College of Cardiology                           |
| Don't perform cardiac imaging for patients who are at low risk.                                                                                                                                                                                                             | American Society of Nuclear Cardiology                   |
| Don't perform stress cardiac imaging or coronary angiography in patients without cardiac symptoms unless high-risk markers are present.                                                                                                                                     | American Society of Nuclear Cardiology                   |
| Avoid using stress echocardiograms on asymptomatic patients who meet "low risk" scoring criteria for coronary disease.                                                                                                                                                      | American Society of Echocardiography                     |
| Don't perform coronary CMR in the initial evaluation of asymptomatic patients.                                                                                                                                                                                              | Society for Cardiovascular Magnetic Resonance            |
| Don't perform stress cardiovascular magnetic resonance (CMR) in the initial evaluation of chest pain patients with low pretest probability of coronary artery disease.                                                                                                      | Society for Cardiovascular Magnetic Resonance            |
| Don't screen for ovarian cancer in asymptomatic women at average risk.                                                                                                                                                                                                      | American College of Obstetricians and Gynecologists      |
| Don't screen low risk women with CA-125 or ultrasound for ovarian cancer.                                                                                                                                                                                                   | Society of Gynecologic Oncology                          |
| Don't take a multi-vitamin, vitamin E or beta carotene to prevent cardiovascular disease or cancer.                                                                                                                                                                         | American College of Preventive Medicine                  |
| Don't prescribe biologics for rheumatoid arthritis before a trial of methotrexate (or other conventional non-biologic DMARDs).                                                                                                                                              | American College of Rheumatology                         |
| For a patient with functional abdominal pain syndrome (as per ROME III criteria) computed tomography (CT) scans should not be repeated unless there is a major change in clinical findings or symptoms.                                                                     | American Gastroenterological Association                 |
| Don't use antimicrobials to treat bacteriuria in older adults unless specific urinary tract symptoms are present.                                                                                                                                                           | American Geriatrics Society                              |
| Don't treat asymptomatic bacteriuria with antibiotics.                                                                                                                                                                                                                      | Infectious Diseases Society of America                   |
| Avoid using PET or PET-CT scanning as part of routine follow-up care to monitor for a cancer recurrence in asymptomatic patients who have finished initial treatment to eliminate the cancer unless there is high-level evidence that such imaging will change the outcome. | American Society of Clinical Oncology                    |
| Don't perform PET, CT, and radionuclide bone scans in the staging of early breast cancer at low risk for metastasis.                                                                                                                                                        | American Society of Clinical Oncology                    |
| Don't perform PET, CT, and radionuclide bone scans in the staging of early prostate cancer at low risk for metastasis.                                                                                                                                                      | American Society of Clinical Oncology                    |
| Don't initiate management of low-risk prostate cancer without discussing active surveillance.                                                                                                                                                                               | American Society for Radiation Oncology                  |
| Don't recommend bed rest for more than 48 hours when treating low back pain.                                                                                                                                                                                                | North American Spine Society                             |
| Avoid coronary angiography in post-coronary artery bypass graft (CABG) and post-PCI patients who are asymptomatic, or who have normal or mildly abnormal                                                                                                                    | Society for Cardiovascular Angiography and Interventions |

|                                                                                                                                                                                                                                                                                                          |                                                                    |
|----------------------------------------------------------------------------------------------------------------------------------------------------------------------------------------------------------------------------------------------------------------------------------------------------------|--------------------------------------------------------------------|
| stress tests and stable symptoms not limiting quality of life.                                                                                                                                                                                                                                           |                                                                    |
| Don't perform stress CMR in patients with acute chest pain and high probability of coronary artery disease.                                                                                                                                                                                              | Society for Cardiovascular Magnetic Resonance                      |
| Avoid routine imaging for cancer surveillance in women with gynecologic cancer, specifically ovarian, endometrial, cervical, vulvar and vaginal cancer.                                                                                                                                                  | Society of Gynecologic Oncology                                    |
| Patients with suspected or biopsy proven Stage I NSCLC do not require brain imaging prior to definitive care in the absence of neurologic symptoms.                                                                                                                                                      | The Society of Thoracic Surgeons                                   |
| <b>CWI recommendations without S3-guideline equivalents associated with good methodological quality and relevant meta-literature (category "2A")</b>                                                                                                                                                     |                                                                    |
| Avoid CT pulmonary angiography in emergency department patients with a low-pretest probability of pulmonary embolism and either a negative Pulmonary Embolism Rule-Out Criteria (PERC) or a negative D-dimer.                                                                                            | American College of Emergency Physicians                           |
| Don't perform chest computed tomography (CT angiography) to evaluate for possible pulmonary embolism in patients with a low clinical probability and negative results of a highly sensitive D-dimer assay.                                                                                               | American College of Chest Physicians and American Thoracic Society |
| Don't place an indwelling urinary catheter to manage urinary incontinence.                                                                                                                                                                                                                               | AMDA – The Society for Post-Acute and Long-Term Care Medicine      |
| Don't place or maintain a urinary catheter in a patient unless there is a specific indication to do so.                                                                                                                                                                                                  | American Academy of Nursing                                        |
| Avoid placing indwelling urinary catheters in the emergency department for either urine output monitoring in stable patients who can void, or for patient or staff convenience.                                                                                                                          | American College of Emergency Physicians                           |
| Don't place, or leave in place, urinary catheters for incontinence or convenience or monitoring of output for non-critically ill patients (acceptable indications: critical illness, obstruction, hospice, preoperatively for <2 days for urologic procedures; use weights instead to monitor diuresis). | Society of Hospital Medicine – Adult Hospital Medicine             |
| Don't initiate antihypertensive treatment in individuals ≥60 years of age for systolic blood pressure (SBP) <150 mm Hg or diastolic blood pressure (DBP) <90 mm Hg.                                                                                                                                      | AMDA – The Society for Post-Acute and Long-Term Care Medicine      |
| Don't recommend screening for breast, colorectal or prostate cancer if life expectancy is estimated to be less than 10 years.                                                                                                                                                                            | AMDA – The Society for Post-Acute and Long-Term Care Medicine      |
| Avoid colorectal cancer screening tests on asymptomatic patients with a life expectancy of less than 10 years and no family or personal history of colorectal neoplasia.                                                                                                                                 | American College of Surgeons                                       |
| Don't recommend screening for breast, colorectal, prostate or lung cancer without considering life expectancy and the risks of testing, overdiagnosis and overtreatment.                                                                                                                                 | American Geriatrics Society                                        |
| Don't perform routine cancer screening for dialysis patients with limited life expectancies without signs or symptoms.                                                                                                                                                                                   | American Society of Nephrology                                     |
| Don't recommend cancer screening in adults with life expectancy of less than 10 years.                                                                                                                                                                                                                   | Society of General Internal Medicine                               |
| Don't obtain a C. difficile toxin test to confirm "cure" if symptoms have resolved.                                                                                                                                                                                                                      | AMDA – The Society for Post-Acute and Long-Term Care Medicine      |
| Don't insert percutaneous feeding tubes in individuals with advanced dementia. Instead, offer oral assisted                                                                                                                                                                                              | AMDA – The Society for Post-Acute and Long-Term Care Medicine      |

|                                                                                                                                                                                                       |                                                               |
|-------------------------------------------------------------------------------------------------------------------------------------------------------------------------------------------------------|---------------------------------------------------------------|
| feedings.                                                                                                                                                                                             |                                                               |
| Don't use sliding scale insulin (SSI) for long-term diabetes management for individuals residing in the nursing home.                                                                                 | AMDA – The Society for Post-Acute and Long-Term Care Medicine |
| Don't obtain a urine culture unless there are clear signs and symptoms that localize to the urinary tract.                                                                                            | AMDA – The Society for Post-Acute and Long-Term Care Medicine |
| Avoid the use of surveillance cultures for the screening and treatment of asymptomatic bacteruria.                                                                                                    | American Academy of Pediatrics                                |
| Don't order annual electrocardiograms (EKGs) or any other cardiac screening for low-risk patients without symptoms.                                                                                   | American Academy of Family Physicians                         |
| Don't prescribe antibiotics for otitis media in children aged 2-12 years with non-severe symptoms where the observation option is reasonable.                                                         | American Academy of Family Physicians                         |
| Don't screen women older than 65 years of age for cervical cancer who have had adequate prior screening and are not otherwise at high risk for cervical cancer.                                       | American Academy of Family Physicians                         |
| Don't perform screening for cervical cancer in low-risk women aged 65 years or older and in women who have had a total hysterectomy for benign disease.                                               | American College of Preventive Medicine                       |
| Don't schedule elective, non-medically indicated inductions of labor or Cesarean deliveries before 39 weeks, 0 days gestational age.                                                                  | American Academy of Family Physicians                         |
| Don't schedule elective, non-medically indicated inductions of labor or Cesarean deliveries before 39 weeks 0 days gestational age.                                                                   | American College of Obstetricians and Gynecologists           |
| Don't screen women younger than 30 years of age for cervical cancer with HPV testing, alone or in combination with cytology.                                                                          | American Academy of Family Physicians                         |
| Avoid elective, non-medically indicated inductions of labor between 39 weeks, 0 days and 41 weeks, 0 days unless the cervix is deemed favorable.                                                      | American Academy of Family Physicians                         |
| Don't schedule elective, non-medically indicated inductions of labor between 39 weeks 0 days and 41 weeks 0 days unless the cervix is deemed favorable.                                               | American College of Obstetricians and Gynecologists           |
| Don't perform Pap smears on women younger than 21 or who have had a hysterectomy for non-cancer disease.                                                                                              | American Academy of Family Physicians                         |
| Don't screen adolescents for scoliosis.                                                                                                                                                               | American Academy of Family Physicians                         |
| Don't perform voiding cystourethrogram (VCUG) routinely in first febrile urinary tract infection (UTI) in children aged 2 -24 months.                                                                 | American Academy of Family Physicians                         |
| Don't perform imaging of the carotid arteries for simple syncope without other neurologic symptoms.                                                                                                   | American Academy of Neurology                                 |
| Don't recommend CEA for asymptomatic carotid stenosis unless the complication rate is low (<3%).                                                                                                      | American Academy of Neurology                                 |
| Don't perform electroencephalography (EEG) for headaches.                                                                                                                                             | American Academy of Neurology                                 |
| Don't prescribe interferon-beta or glatiramer acetate to patients with disability from progressive, non-relapsing forms of multiple sclerosis.                                                        | American Academy of Neurology                                 |
| Don't automatically initiate continuous electronic fetal heart rate (FHR) monitoring during labor for women without risk factors; consider intermittent auscultation (IA) first.                      | American Academy of Nursing                                   |
| Don't routinely use blood products to reverse warfarin.                                                                                                                                               | American Association of Blood Banks                           |
| Don't administer plasma or prothrombin complex concentrates for non-emergent reversal of vitamin K antagonists (i.e. outside of the setting of major bleeding, intracranial hemorrhage or anticipated | American Society of Hematology                                |

|                                                                                                                                                                                                                                                                                 |                                                             |
|---------------------------------------------------------------------------------------------------------------------------------------------------------------------------------------------------------------------------------------------------------------------------------|-------------------------------------------------------------|
| emergent surgery).                                                                                                                                                                                                                                                              |                                                             |
| Don't transfuse more units of blood than absolutely necessary.                                                                                                                                                                                                                  | American Association of Blood Banks                         |
| Don't transfuse more than the minimum number of red blood cell (RBC) units necessary to relieve symptoms of anemia or to return a patient to a safe hemoglobin range (7 to 8 g/dL in stable, non-cardiac in-patients).                                                          | American Society of Hematology                              |
| Don't perform stress cardiac imaging or advanced non-invasive imaging as a pre-operative assessment in patients scheduled to undergo low-risk non cardiac surgery.                                                                                                              | American College of Cardiology                              |
| Don't obtain baseline diagnostic cardiac testing (trans-thoracic/esophageal echocardiography – TTE/TEE) or cardiac stress testing in asymptomatic stable patients with known cardiac disease (e.g., CAD, valvular disease) undergoing low or moderate risk non-cardiac surgery. | American Society of Anesthesiologists                       |
| Don't perform cardiac imaging as a pre-operative assessment in patients scheduled to undergo low- or intermediate- risk non-cardiac surgery.                                                                                                                                    | American Society of Nuclear Cardiology                      |
| Don't perform stress CMR as a pre-operative assessment in patients scheduled to undergo low-risk, non-cardiac surgery.                                                                                                                                                          | Society for Cardiovascular Magnetic Resonance               |
| Patients who have no cardiac history and good functional status do not require preoperative stress testing prior to non-cardiac thoracic surgery.                                                                                                                               | The Society of Thoracic Surgeons                            |
| Avoid cardiovascular testing for patients undergoing low-risk surgery.                                                                                                                                                                                                          | Society for Vascular Medicine                               |
| Avoid computed tomography (CT) scans of the head in emergency department patients with minor head injury who are at low risk based on validated decision rules.                                                                                                                 | American College of Emergency Physicians                    |
| Avoid ordering a brain CT or brain MRI to evaluate an acute concussion unless there are progressive neurological symptoms, focal neurological findings on exam or there is concern for a skull fracture.                                                                        | American Medical Society for Sports Medicine                |
| Avoid instituting intravenous (IV) fluids before doing a trial or oral rehydration therapy in uncomplicated emergency department cases of mild to moderate dehydration in children.                                                                                             | American College of Emergency Physicians                    |
| Don't order low back X-rays as part of a routine preplacement medical examination.                                                                                                                                                                                              | American College of Occupational and Environmental Medicine |
| Don't prescribe opioids for treatment of chronic or acute pain for workers who perform safety-sensitive jobs such as operating motor vehicles, forklifts, cranes or other heavy equipment.                                                                                      | American College of Occupational and Environmental Medicine |
| Don't routinely order sleep studies (polysomnogram) to screen for/diagnose sleep disorders in workers suffering from chronic fatigue/insomnia.                                                                                                                                  | American College of Occupational and Environmental Medicine |
| Don't routinely order X-ray for diagnosis of plantar fasciitis/heel pain in employees who stand or walk at work.                                                                                                                                                                | American College of Occupational and Environmental Medicine |
| Don't initially obtain X-rays for injured workers with acute non-specific low back pain.                                                                                                                                                                                        | American College of Occupational and Environmental Medicine |
| Don't test ANA sub-serologies without a positive ANA and clinical suspicion of immune-mediated disease.                                                                                                                                                                         | American College of Rheumatology                            |
| Don't order autoantibody panels unless positive antinuclear antibodies (ANA) and evidence of rheumatic disease.                                                                                                                                                                 | American College of Rheumatology – Pediatric Rheumatology   |
| Don't perform methotrexate toxicity labs more often                                                                                                                                                                                                                             | American College of Rheumatology – Pediatric                |

|                                                                                                                                                                                                                          |                                                               |
|--------------------------------------------------------------------------------------------------------------------------------------------------------------------------------------------------------------------------|---------------------------------------------------------------|
| than every 12 weeks on stable doses.                                                                                                                                                                                     | Rheumatology                                                  |
| Don't perform MRI of the peripheral joints to routinely monitor inflammatory arthritis.                                                                                                                                  | American College of Rheumatology                              |
| Don't routinely repeat DXA scans more often than once every two years.                                                                                                                                                   | American College of Rheumatology                              |
| Don't routinely perform surveillance joint radiographs to monitor juvenile idiopathic arthritis (JIA) disease activity.                                                                                                  | American College of Rheumatology – Pediatric Rheumatology     |
| Don't test for Lyme disease as a cause of musculoskeletal symptoms without an exposure history and appropriate exam findings.                                                                                            | American College of Rheumatology                              |
| Don't use antipsychotics as the first choice to treat behavioral and psychological symptoms of dementia.                                                                                                                 | American Geriatrics Society                                   |
| Don't routinely use antipsychotics as first choice to treat behavioral and psychological symptoms of dementia.                                                                                                           | American Psychiatric Association                              |
| Don't prescribe antipsychotic medications for behavioral and psychological symptoms of dementia (BPSD) in individuals with dementia without an assessment for an underlying cause of the behavior.                       | AMDA – The Society for Post-Acute and Long-Term Care Medicine |
| Don't treat with an anticoagulant for more than three months in a patient with a first venous thromboembolism (VTE) occurring in the setting of a major transient risk factor.                                           | American Society of Hematology                                |
| Don't perform baseline or routine surveillance computed tomography (CT) scans in patients with asymptomatic, early-stage chronic lymphocytic leukemia (CLL).                                                             | American Society of Hematology                                |
| Don't use inferior vena cava (IVC) filters routinely in patients with acute VTE.                                                                                                                                         | American Society of Hematology                                |
| Don't administer plasma or prothrombin complex concentrates for non-emergent reversal of vitamin K antagonists (i.e. outside of the setting of major bleeding, intracranial hemorrhage or anticipated emergent surgery). | American Society of Hematology                                |
| Don't routinely transfuse patients with sickle cell disease (SCD) for chronic anemia or uncomplicated pain crisis without an appropriate clinical indication.                                                            | American Society of Hematology                                |
| Don't test for thrombophilia in adult patients with venous thromboembolism (VTE) occurring in the setting of major transient risk factors (surgery, trauma or prolonged immobility).                                     | American Society of Hematology                                |
| Don't test or treat for suspected heparin-induced thrombocytopenia (HIT) in patients with a low pre-test probability of HIT.                                                                                             | American Society of Hematology                                |
| Don't treat patients with immune thrombocytopenic purpura (ITP) in the absence of bleeding or a very low platelet count.                                                                                                 | American Society of Hematology                                |
| Avoid using drains in breast reduction mammaplasty.                                                                                                                                                                      | American Society of Plastic Surgeons                          |
| Avoid continuing prophylactic antibiotics for greater than 24 hours after a surgical procedure.                                                                                                                          | American Society of Plastic Surgeons                          |
| Avoid performing routine and follow-up mammograms of reconstructed breasts after mastectomies.                                                                                                                           | American Society of Plastic Surgeons                          |
| Avoid performing routine mammograms before breast surgery.                                                                                                                                                               | American Society of Plastic Surgeons                          |
| Don't routinely use extended fractionation schemes (>10 fractions) for palliation of bone metastases.                                                                                                                    | American Society for Radiation Oncology                       |
| Don't initiate non-curative radiation therapy without defining the goals of treatment with the patient and                                                                                                               | American Society for Radiation Oncology                       |

|                                                                                                                                                                        |                                                            |
|------------------------------------------------------------------------------------------------------------------------------------------------------------------------|------------------------------------------------------------|
| considering palliative care referral.                                                                                                                                  |                                                            |
| Don't recommend radiation following hysterectomy for endometrial cancer patients with low-risk disease.                                                                | American Society for Radiation Oncology                    |
| Don't use aloe vera on skin to prevent or treat radiodermatitis.                                                                                                       | American Academy of Nursing                                |
| Don't use mixed medication mouthwash, commonly termed "magic mouthwash," to prevent or manage cancer treatment-induced oral mucositis.                                 | American Academy of Nursing                                |
| Don't use L-carnitine/acetyl-L-carnitine supplements to prevent or treat symptoms of peripheral neuropathy in patients receiving chemotherapy for treatment of cancer. | American Academy of Nursing                                |
| Don't treat gastroesophageal reflux in infants routinely with acid suppression therapy.                                                                                | Society of Hospital Medicine – Pediatric Hospital Medicine |
| Don't routinely use bronchodilators in children with bronchiolitis.                                                                                                    | Society of Hospital Medicine – Pediatric Hospital Medicine |
| Don't order chest radiographs in children with uncomplicated asthma or bronchiolitis.                                                                                  | Society of Hospital Medicine – Pediatric Hospital Medicine |
| Don't use continuous pulse oximetry routinely in children with acute respiratory illness unless they are on supplemental oxygen.                                       | Society of Hospital Medicine – Pediatric Hospital Medicine |
| Don't use systemic corticosteroids in children under 2 years of age with an uncomplicated lower respiratory tract infection.                                           | Society of Hospital Medicine – Pediatric Hospital Medicine |
| Don't initiate routine evaluation of carotid artery disease prior to cardiac surgery in the absence of symptoms or other high-risk criteria.                           | The Society of Thoracic Surgeons                           |
| Don't perform a routine pre-discharge echocardiogram after cardiac valve replacement surgery.                                                                          | The Society of Thoracic Surgeons                           |
| CWI: Choosing Wisely Initiative; GoR: Grad of recommendation                                                                                                           |                                                            |
